# Supplementary material for: In situ generation of fluorescent silver nanoclusters in layer-by-layer assembled films
Source: Royal Society of Chemistry journal article supplement (doi:10.1039/c3tc00415e), 2013-01-01
Supplement: c3tc00415e.pdf [file c3tc00415e.pdf]

Electronic Supplementary Information  
for  
**In situ Generation of Fluorescent Silver Nanoclusters in  
Layer-by-Layer Assembled Films**

Wenjing Zhang<sup>1</sup>, Jia Song<sup>1</sup>, Wang Liao<sup>1</sup>, Ying Guan<sup>1\*</sup>, Yongjun Zhang<sup>1\*</sup> and X. X. Zhu<sup>1,2\*</sup>

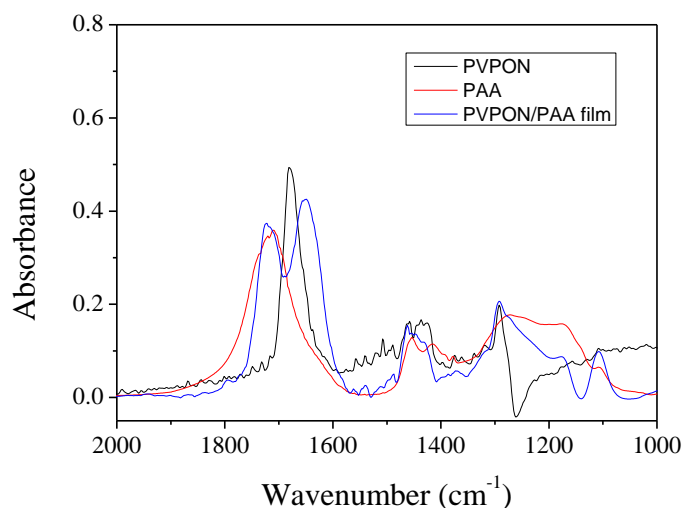

Fig. S1 FTIR spectra of PVPON, PAA, and a PVPON/PAA LBL film. The IR band of the carbonyl groups in PAA shifts from 1710 to 1724 cm<sup>-1</sup>, while IR band of the carbonyl groups in PVPON shifts from 1680 to 1650 cm<sup>-1</sup>, indicating the formation of strong intermolecular hydrogen bonds between PVPON and PAA in the LBL films.

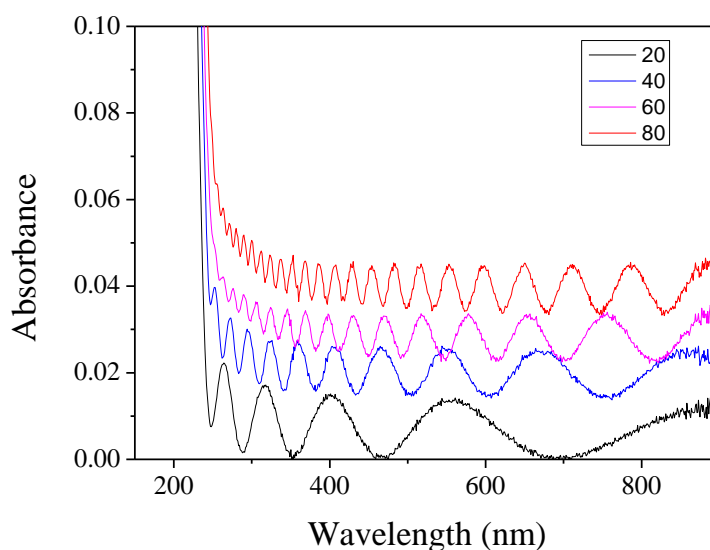

Fig. S2 Absorption spectra of 20, 40, 60, 80 bilayer PVPON/PAA films. The plots are shifted along the vertical axis for clarity. The film thicknesses of the films were determined to be 499.9, 1059, 1726, 2509nm, respectively, from the Fabry-Perot fringes using a refractive index of 1.51.

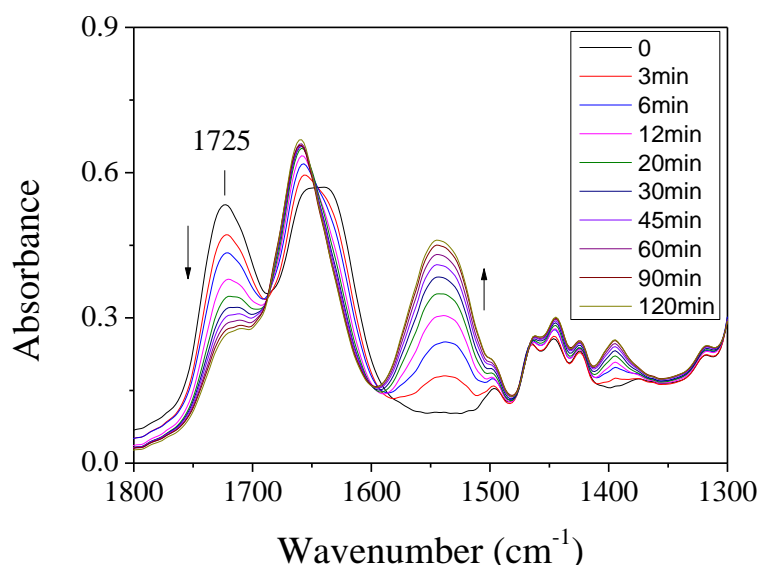

Fig. S3 FTIR spectra of a (PVPON/PAA)25 film before and after being loaded with Ag<sup>+</sup> ions by immersing in AgNO<sub>3</sub> solution for various time. According to Eq. 1, ( $q_e = (A_{1725,0} - A_{1725,e})/A_{1725,0}$ ), Ag<sup>+</sup> concentration in the film was calculated to be 49.9 %.

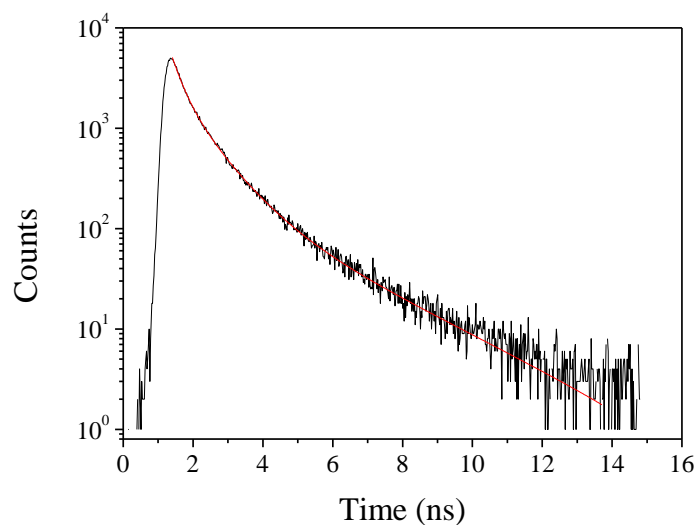

Fig. S4 Lifetime measurements of the fluorescent LbL film.
